# Supplementary material for: Potential for Acanthoscelides obtectus to Adapt to New Hosts Seen in Laboratory Selection Experiments
Source: MDPI journal article supplement (doi:10.3390/insects10060153), 2019-05-29
Supplement: s1 [file s1]

Table S1. Student t-test between group comparisons of R0, rm, T, D and  $\lambda$  population parameters.

[illegible][illegible]

| D   | CcC | CcP | CpP | MmM | MmP | MpP | PcC | PmM | PpC | PpM | PpP |
|-----|-----|-----|-----|-----|-----|-----|-----|-----|-----|-----|-----|
| CcC | /   |     |     |     |     |     |     |     |     |     |     |
| CcP | *** | /   |     |     |     |     |     |     |     |     |     |
| CpP | *** | *** | /   |     |     |     |     |     |     |     |     |
| MmM | *** | *** | *** | /   |     |     |     |     |     |     |     |
| MmP | *** | *** | ns  | *** | /   |     |     |     |     |     |     |
| MpP | *** | *** | *** | *** | *** | /   |     |     |     |     |     |
| PcC | *** | *** | *   | *** | *   | **  | /   |     |     |     |     |
| PmM | *** | *** | ns  | *** | ns  | *   | ns  | /   |     |     |     |
| PpC | *** | *** | ns  | *   | ns  | *** | **  | *   | /   |     |     |
| PpM | *** | *** | ns  | **  | ns  | *** | *   | ns  | ns  | /   |     |
| PpP | *** | ns  | *** | *** | *** | *** | *** | *** | *** | *** | /   |

| R0  | CcC | CcP | CpP | MmM | MmP | MpP | PcC | PmM | PpC | PpM | PpP |
|-----|-----|-----|-----|-----|-----|-----|-----|-----|-----|-----|-----|
| CcC | /   |     |     |     |     |     |     |     |     |     |     |
| CcP | *** | /   |     |     |     |     |     |     |     |     |     |
| CpP | *** | *** | /   |     |     |     |     |     |     |     |     |
| MmM | *** | *** | *** | /   |     |     |     |     |     |     |     |
| MmP | *** | *** | *** | **  | /   |     |     |     |     |     |     |
| MpP | *** | *** | **  | *** | *** | /   |     |     |     |     |     |
| PcC | *** | *** | *** | *** | *** | ns  | /   |     |     |     |     |
| PmM | *** | *** | ns  | *** | *   | ns  | *   | /   |     |     |     |
| PpC | *** | *** | ns  | *** | **  | **  | *** | ns  | /   |     |     |
| PpM | *** | *** | ns  | *** | *** | ns  | *   | ns  | ns  | /   |     |
| PpP | *   | *** | *** | *** | *** | *** | *** | *** | *** | *** | /   |

| T   | CcC | CcP | CpP | MmM | MmP | MpP | PcC | PmM | PpC | PpM | PpP |
|-----|-----|-----|-----|-----|-----|-----|-----|-----|-----|-----|-----|
| CcC | /   |     |     |     |     |     |     |     |     |     |     |
| CcP | ns  | /   |     |     |     |     |     |     |     |     |     |
| CpP | **  | ns  | /   |     |     |     |     |     |     |     |     |
| MmM | *** | *** | *** | /   |     |     |     |     |     |     |     |
| MmP | *** | *** | *** | **  | /   |     |     |     |     |     |     |
| MpP | *** | *** | *** | ns  | *   | /   |     |     |     |     |     |
| PcC | ns  | ns  | *   | *** | *** | *** | /   |     |     |     |     |
| PmM | *** | *** | *** | ns  | *** | *   | *** | /   |     |     |     |
| PpC | ns  | *   | **  | *** | *** | *** | ns  | *** | /   |     |     |
| PpM | ns  | **  | *** | *** | *** | *** | ns  | *** | ns  | /   |     |
| PpP | *** | *** | *** | *   | *** | *** | *** | ns  | *** | *** | /   |
