# Supplementary material for: Potential for Acanthoscelides obtectus to Adapt to New Hosts Seen in Laboratory Selection Experiments
Source: MDPI journal article supplement (doi:10.3390/insects10060153), 2019-05-29

Figure S1. Oviposition during experimentally induced host-shift.

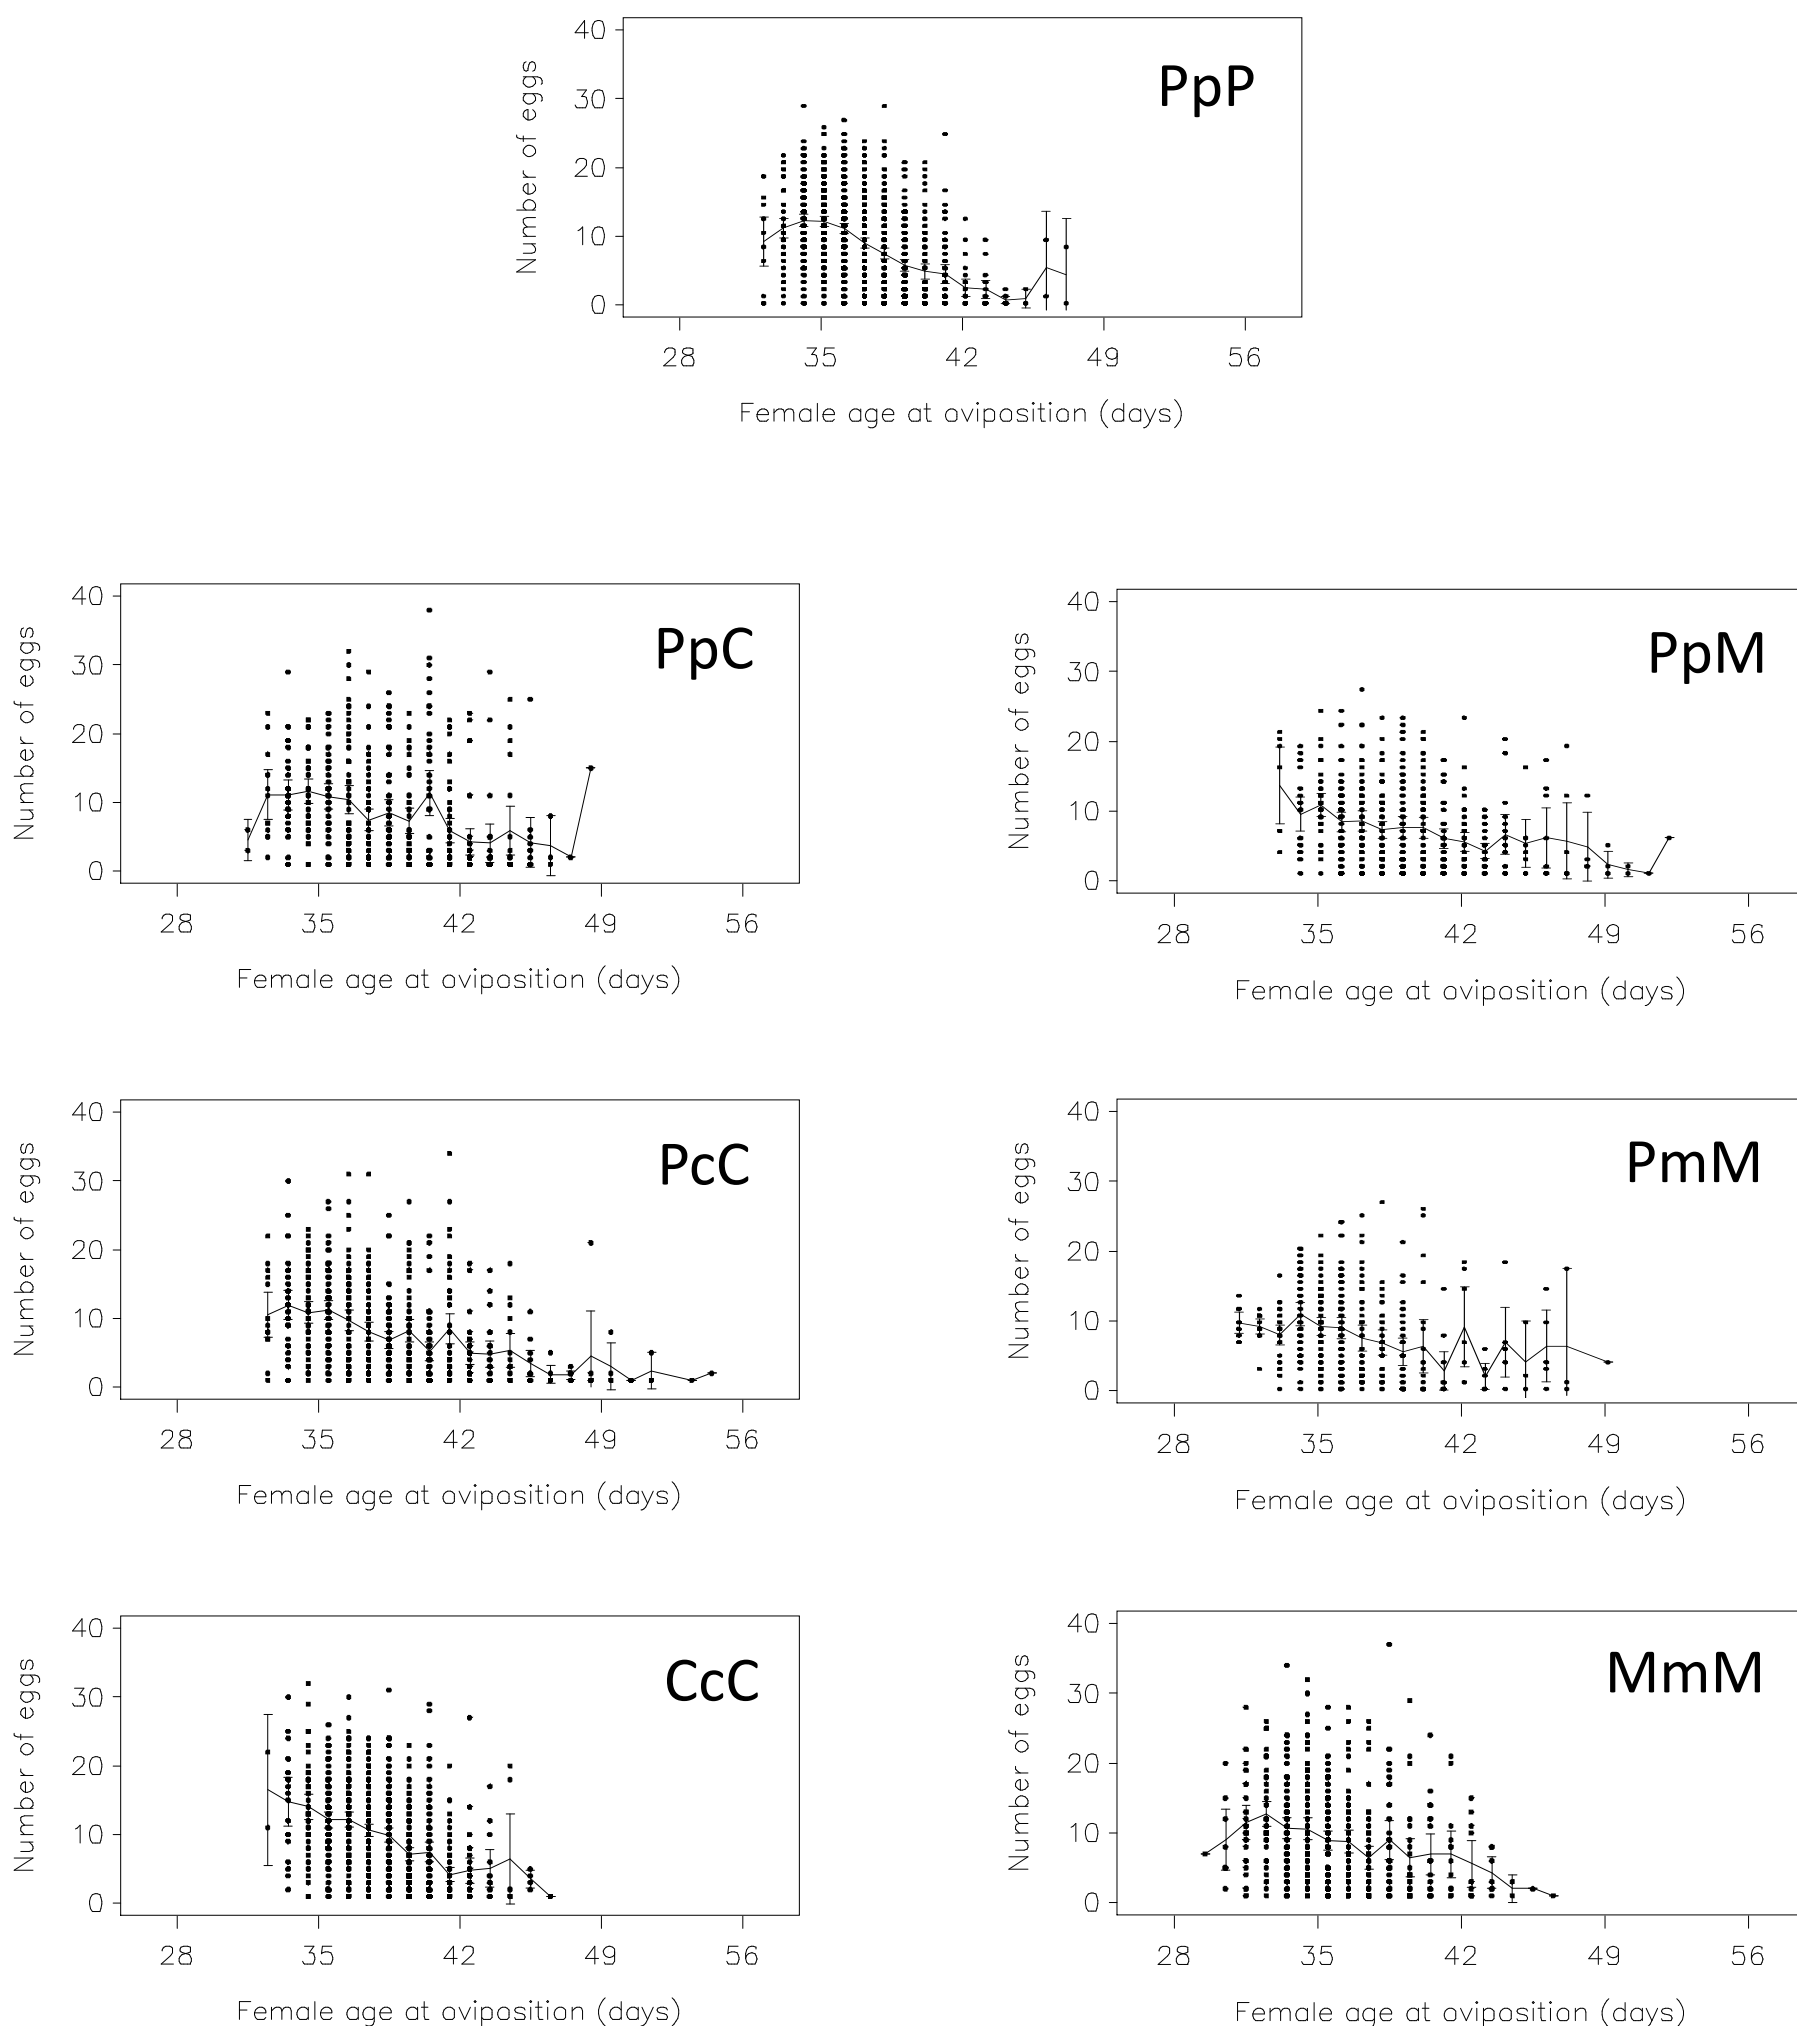

Figure S1 cont. Oviposition during experimentally induced host-shift.

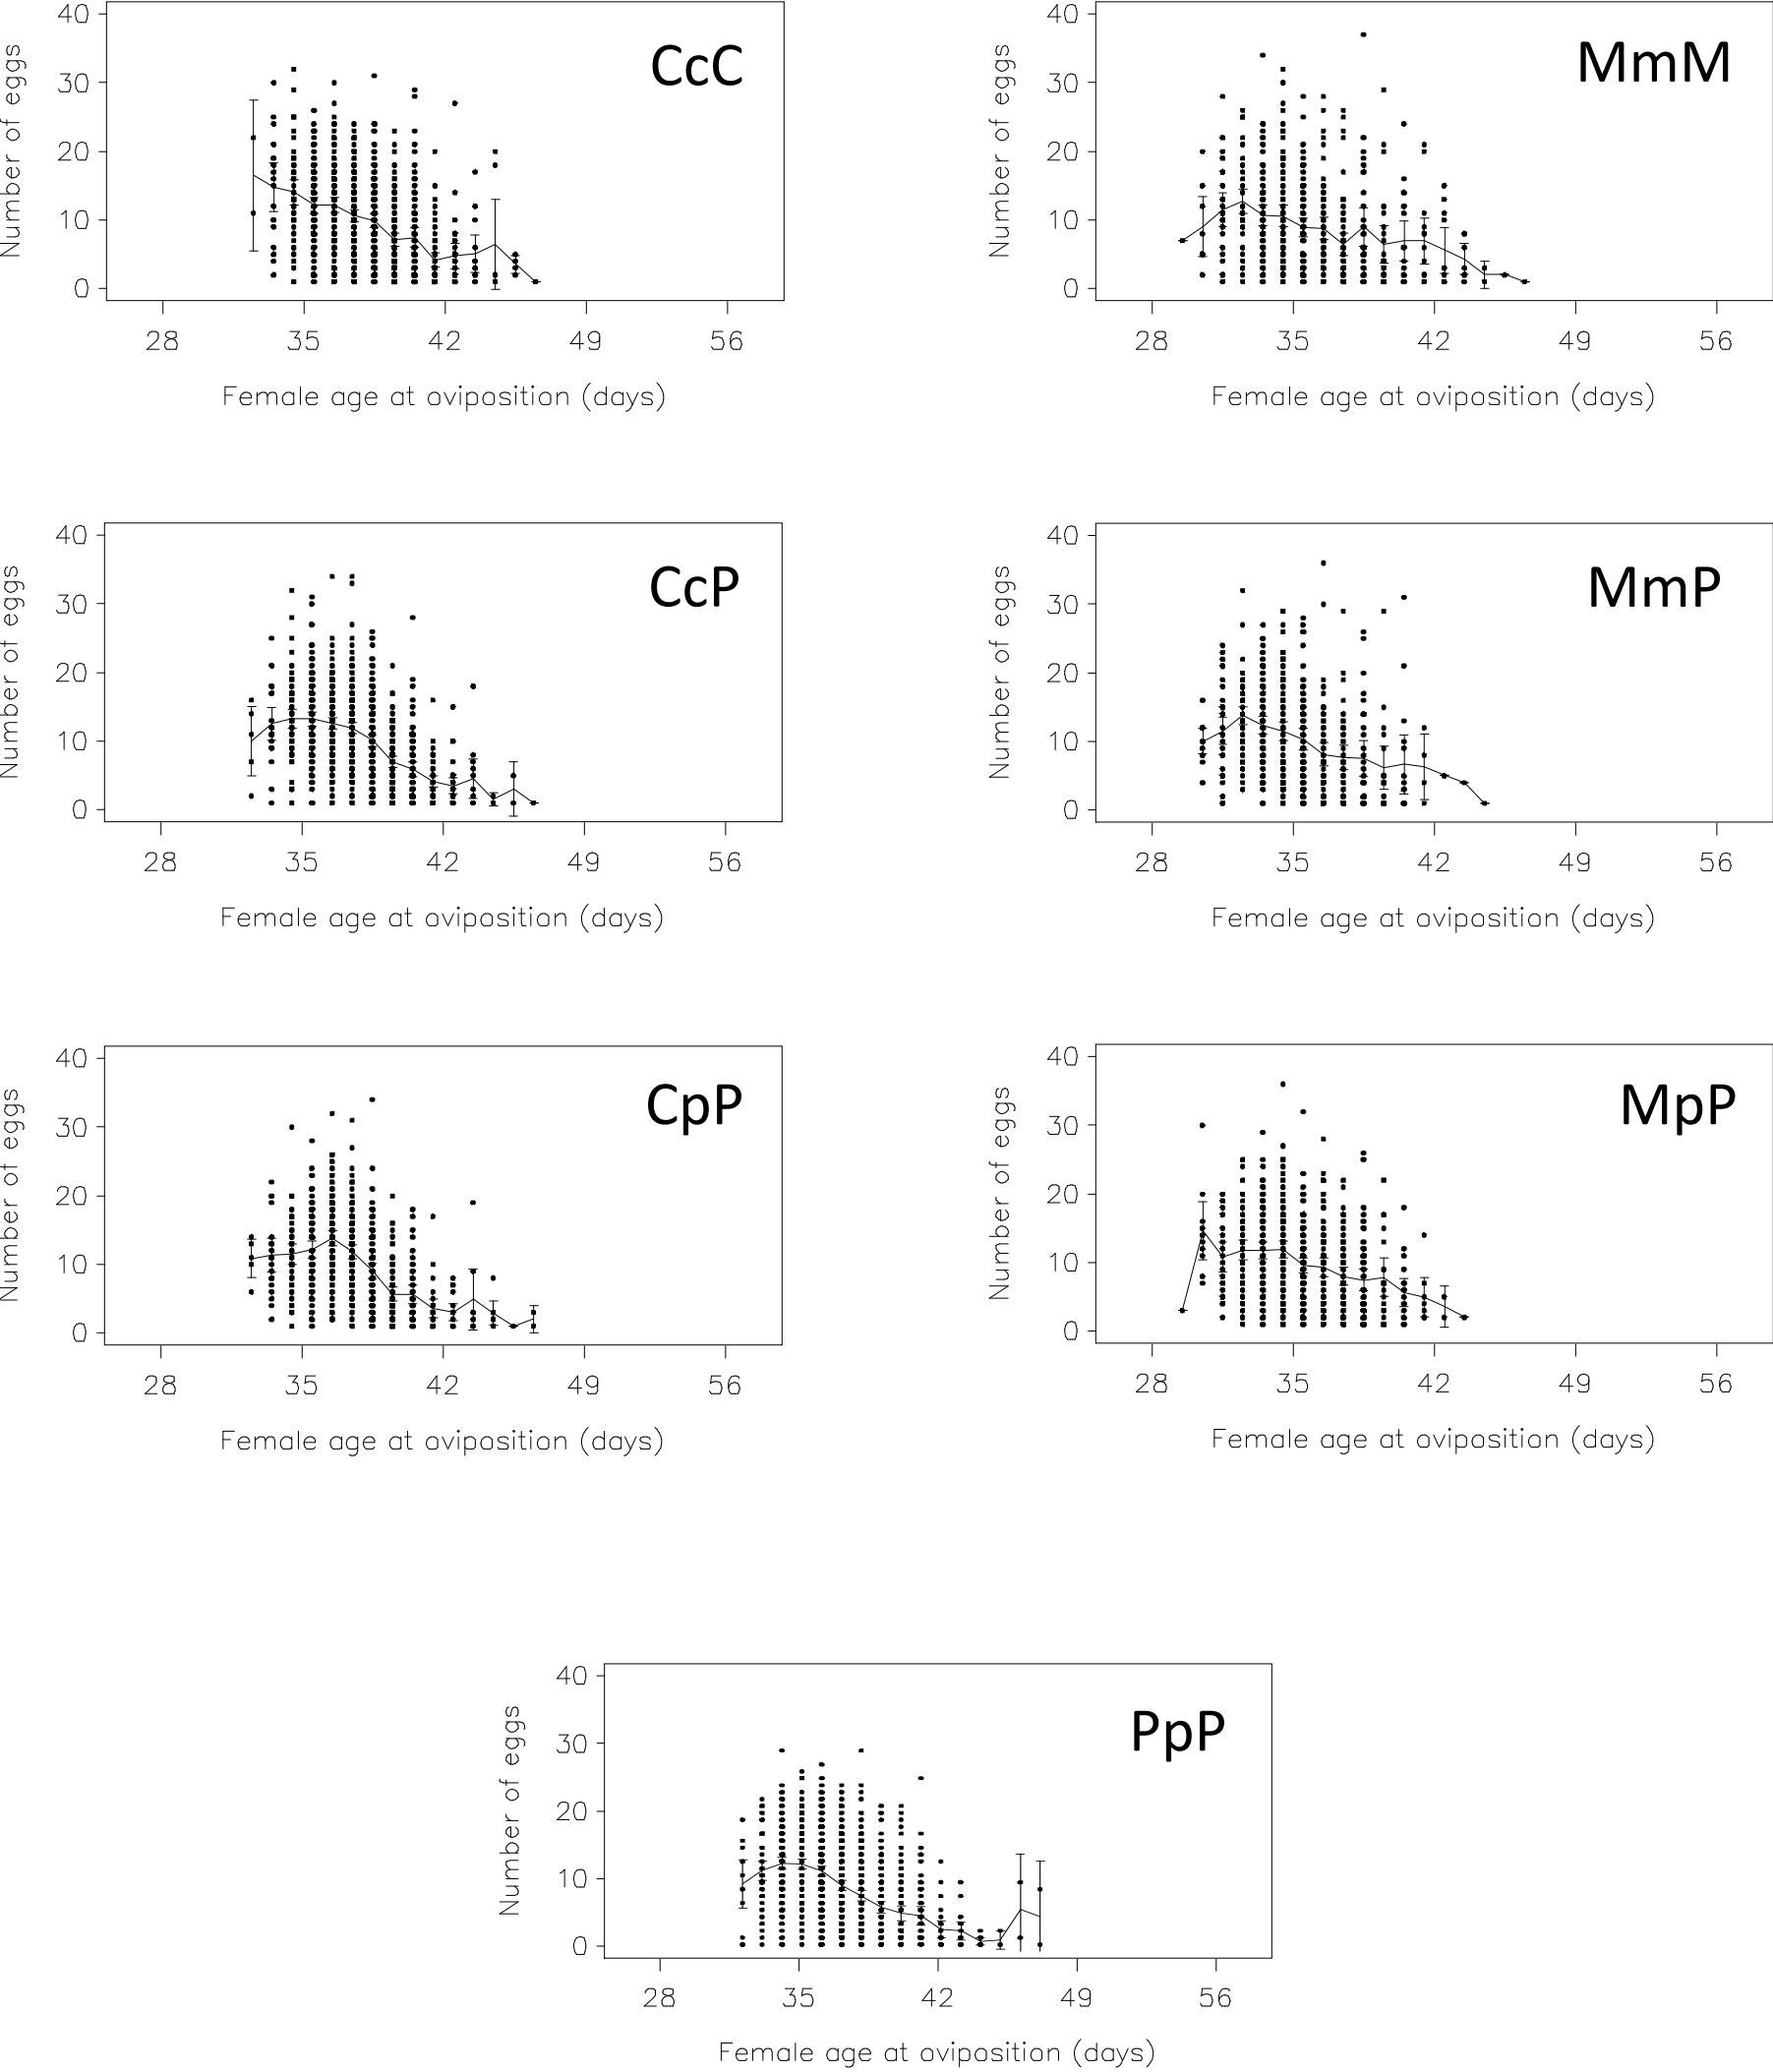

Supplement: s1 [file s1]
